# Supplementary material for: In-host evolution of Staphylococcus epidermidis in a pacemaker-associated endocarditis resulting in increased antibiotic tolerance
Source: PubMed Central journal article supplement (PMC6408453; doi:10.1038/s41467-019-09053-9), 2019-03-08
Supplement: 41467_2019_9053_MOESM1_ESM.pdf [file 41467_2019_9053_MOESM1_ESM.pdf]

Supplementary material for:

# ***In-host evolution of Staphylococcus epidermidis in a pacemaker-associated endocarditis resulting in increased antibiotic tolerance***

Dengler Haunreiter et al.

## **Content**

### **Figures**

- 1) Pulsed-field-gel-electrophoresis of the clinical isolates
- 2) Maximum-likelihood tree
- 3) RpoB gene sequences
- 4) Biofilms treated with DNase and proteinase K
- 5) Cultivation time to reach OD 0.1 and minimum doubling times
- 6) Logarithmic plots of the time-kill curve data
- 7) Antibiotic clearance of bacteria in biofilms
- 8) Time to single-cell first division in DMEM

### **Tables**

- 1) Minimum inhibitory concentrations (MICs)
- 2) Overview of the reference strains used for tree construction
- 3) Summary of the variants found

**Supplementary Figure 1: Pulsed-field gel electrophoresis (PFGE) of *S. epidermidis* isolates obtained from the patient.**

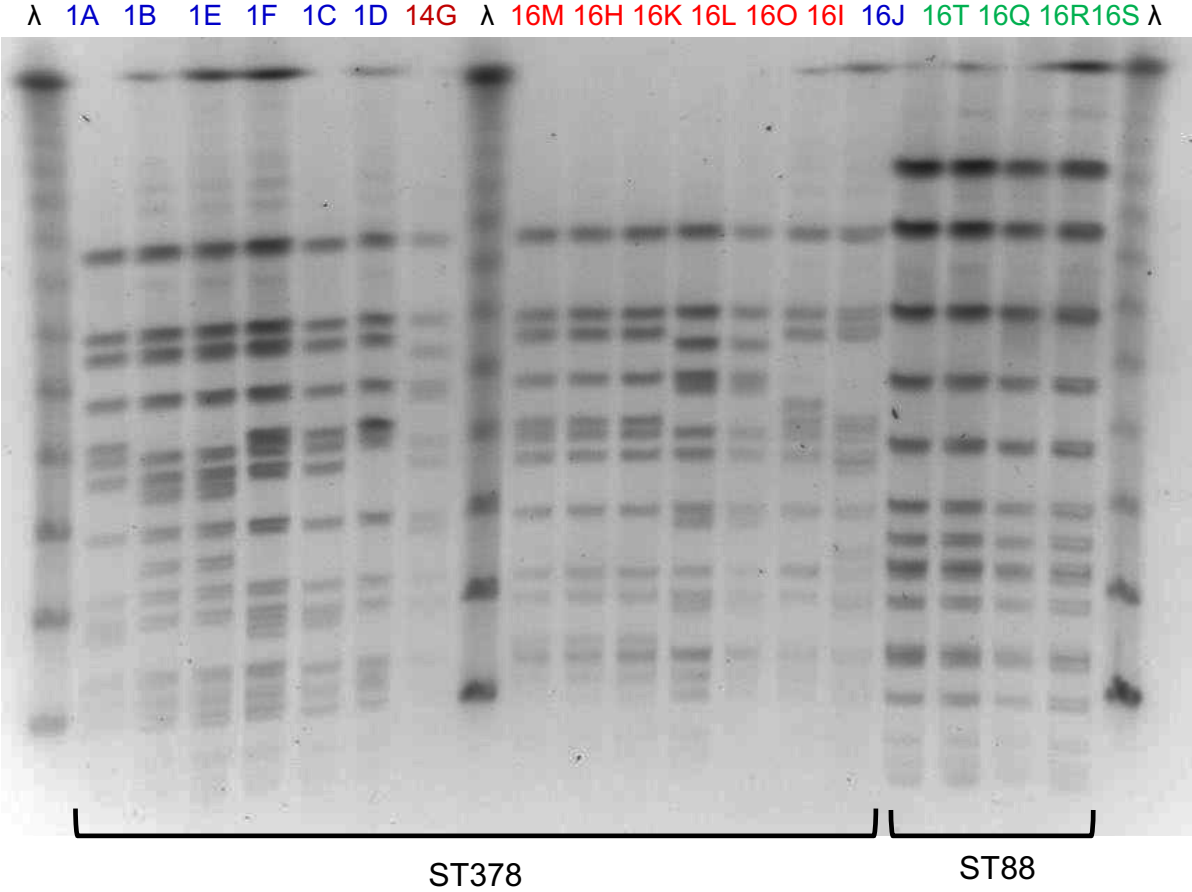

DNA was extracted from *S. epidermidis* isolates and digested with the restriction enzyme *Sma*I. Blue and red labelling of the isolate numbers indicate the ST378 sub-groups I and II, respectively, green labelling indicates ST88 isolates.

**Supplementary Figure 2: Maximum likelihood tree of the ST378 isolates.**

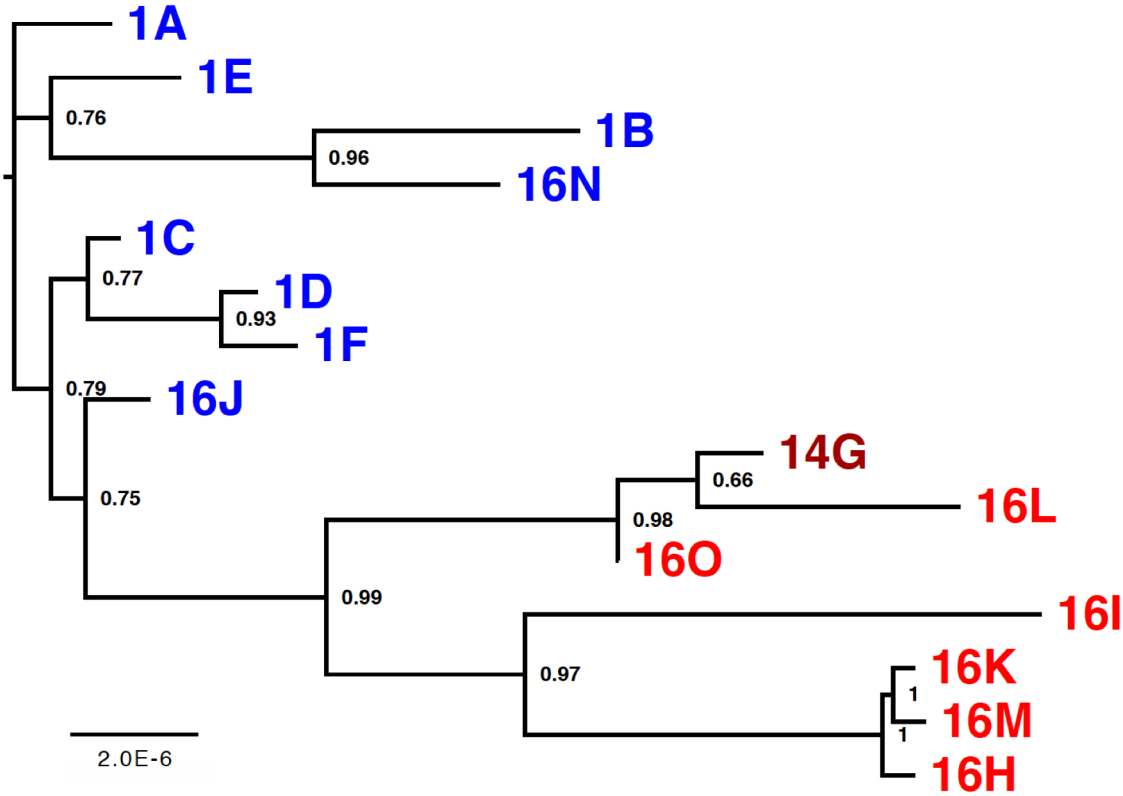

The tree was built on the concatenated core gene alignment. The values displayed on the nodes are local support values computed with the Shimodaira-Hasegawa test by FastTree and the scale bar corresponds to  $2 \times 10^{-6}$  SNPs per site per year. Label colouring of the isolate number highlights the two sub-groups: group I blue and group II red. The darker red indicates the clinical isolate retrieved from the blood culture.

## Supplementary Figure 3: Non-synonymous mutations in the *rpoB* gene.

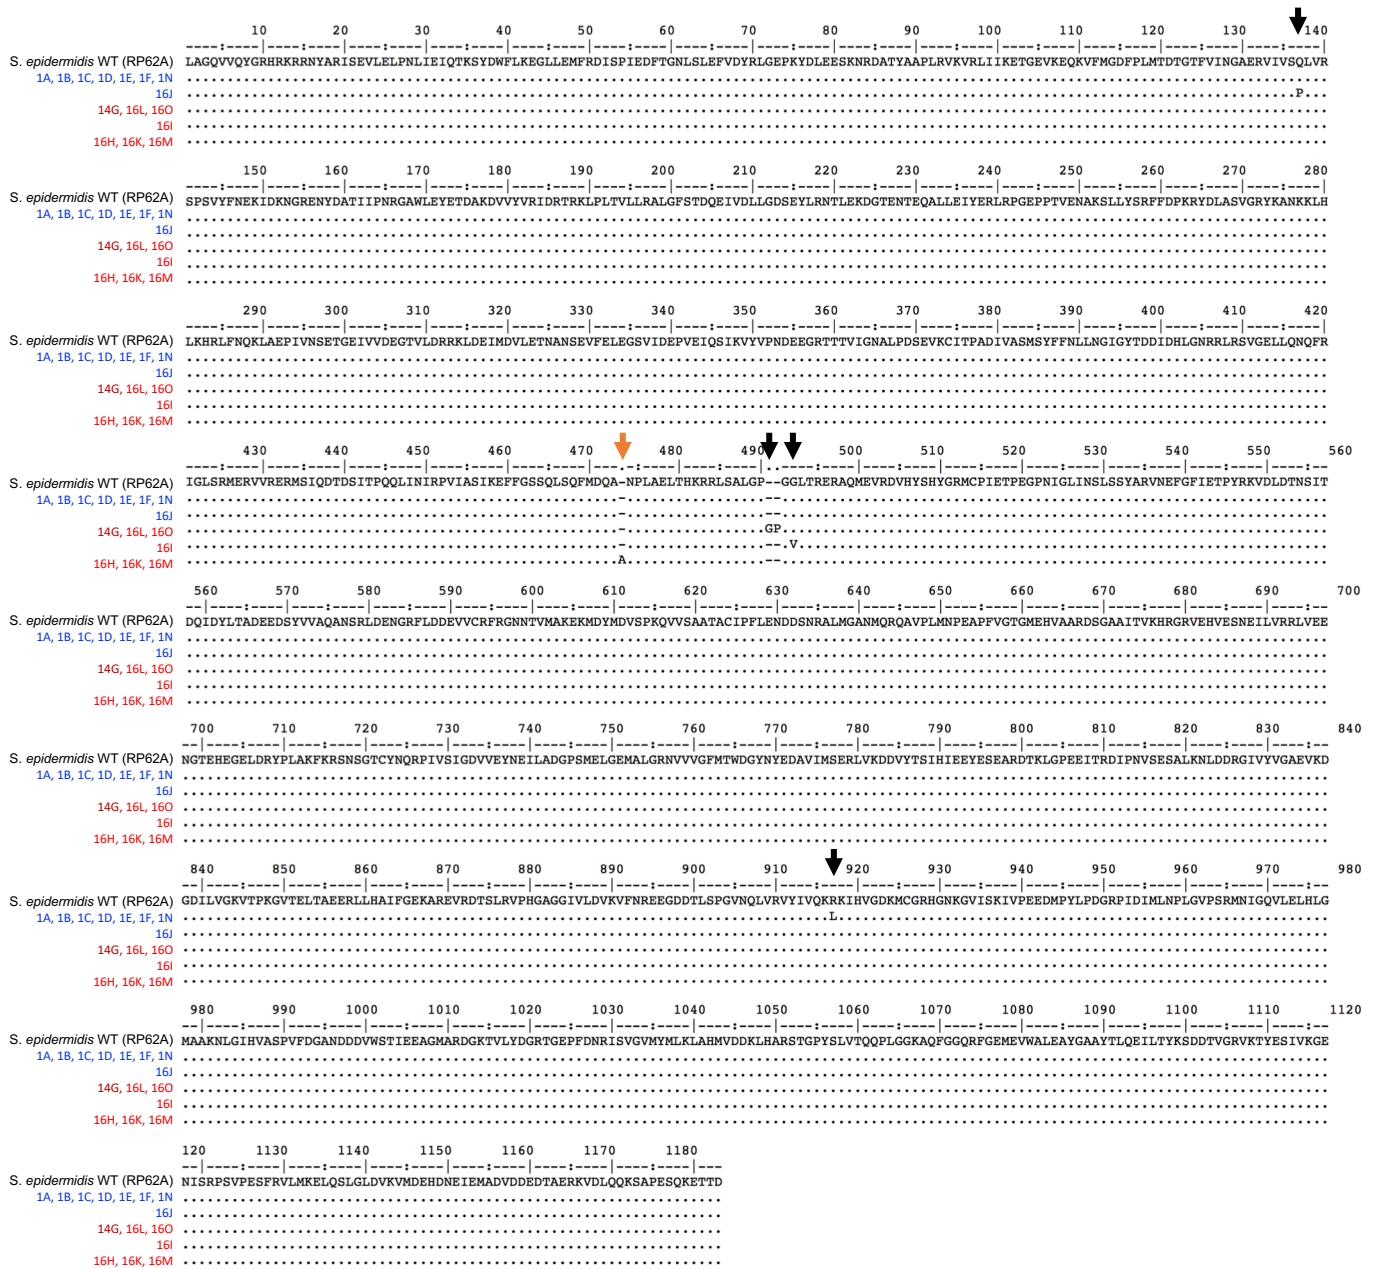

Multiple alignment of the ST378 isolates RpoB to the reference RP62A RpoB amino acid sequences (Genbank accession: AAW53580). Dots indicate matches with the reference. Five non-synonymous mutations (2 insertions and 3 SNPs) were found in different *S. epidermidis* clinical isolates and are indicated by arrows. The orange arrow points at the mutation found in the isolates 16H, 16K and 16M, which displayed resistance to rifampicin (Ala473\_Asn474insAla).

## Supplementary Figure 4: Biofilm treatment with Proteinase K and DNase I of group II isolates.

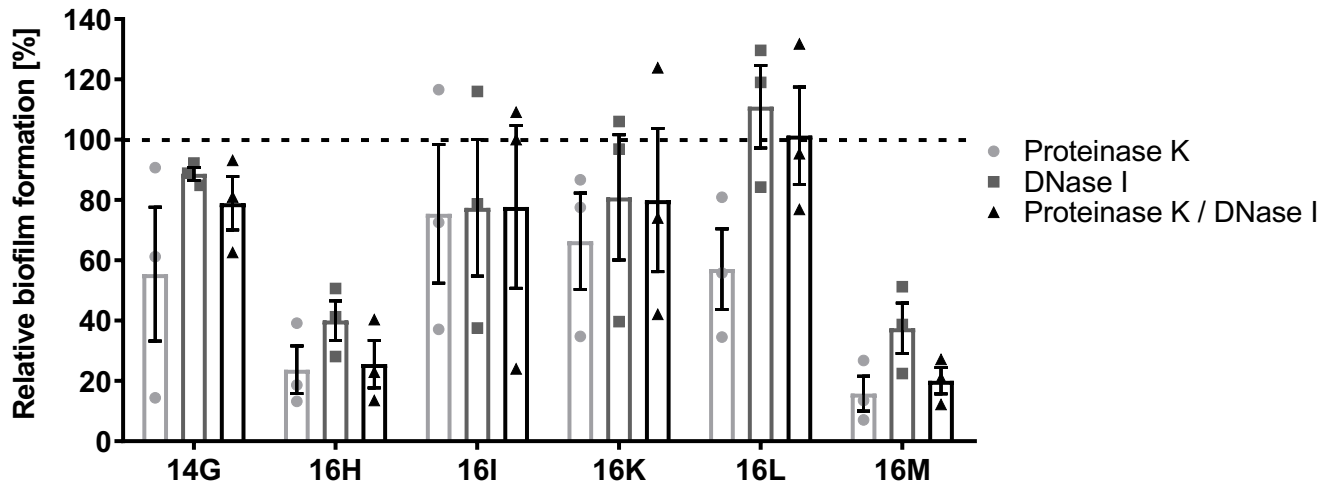

Biofilms were grown in presence of DNase I, proteinase K or both and biofilm formation was quantified after 24 hours by crystal violet staining. Relative biofilm formation compared to untreated biofilm is shown. Averages with standard deviation of three replicates are shown.

## Supplementary Figure 5: Cultivation time to reach OD 0.1 and minimal doubling times of *S. epidermidis* isolates.

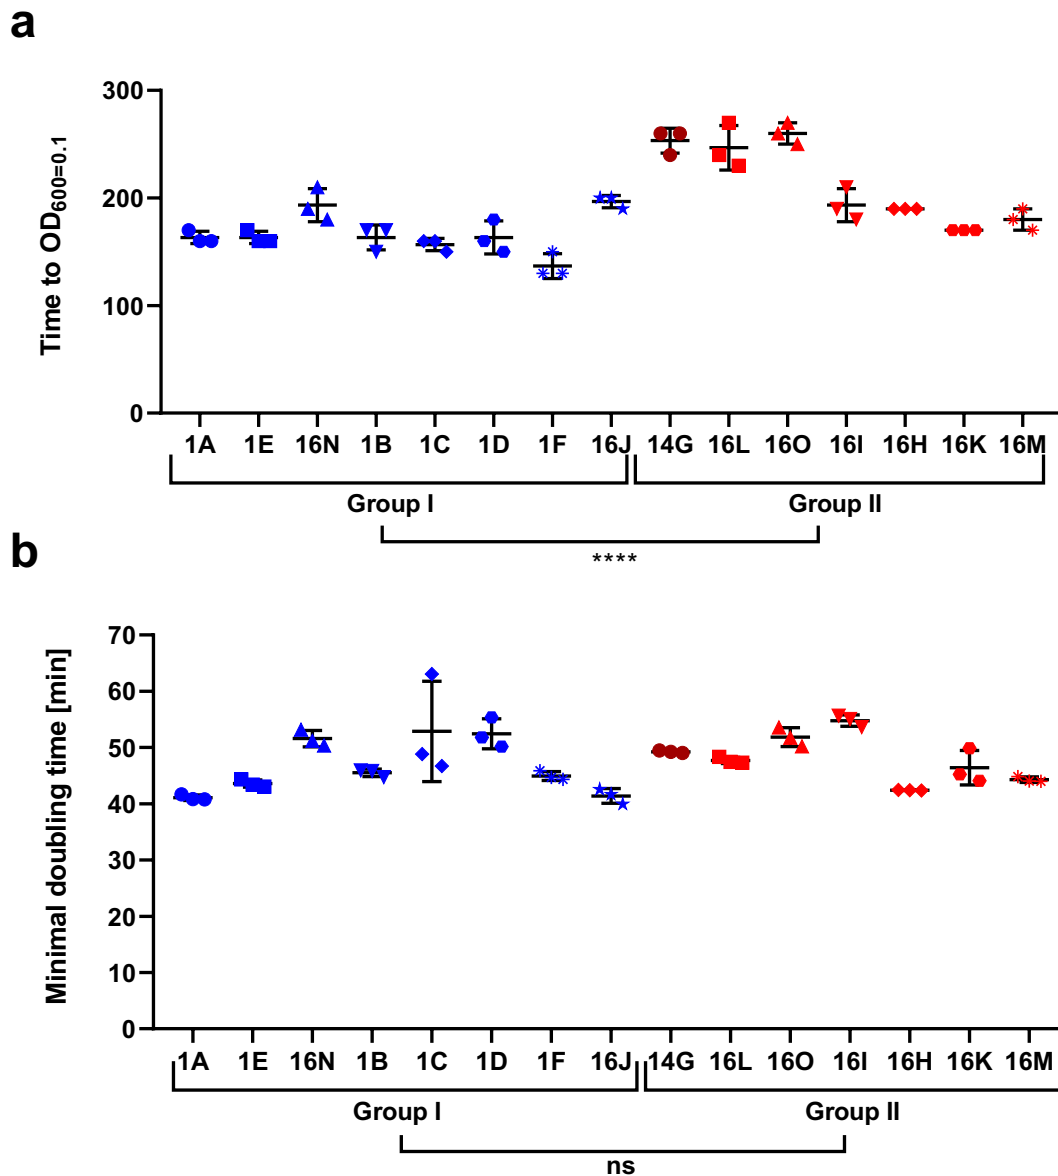

The data was extracted from the growth curves shown in Figure 4a.

**a** Time to reach an OD<sub>600</sub> of 0.1. Statistical significance between the two groups was determined by Welch two-sample t-tests (See figure legend 4a) **b** Minimal doubling times, calculated with an one hour interval from growth curves in TSB in a 96-well plate. Statistical significance between the two groups was determined by Welch two-sample t-tests (N=46,  $t(42.397)=-0,98$ ,  $P=0.33$ ).

Averages with standard deviation of three replicates are shown.

\*\*\*\*  $p < 0.0001$ ; ns, not significant.

## Supplementary Figure S6: Alternative visualization of the time-kill curve experiments.

**a**

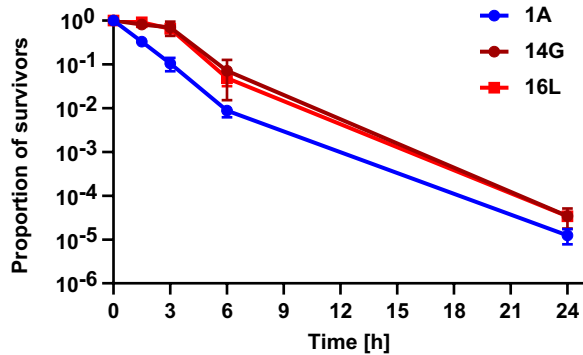

**b**

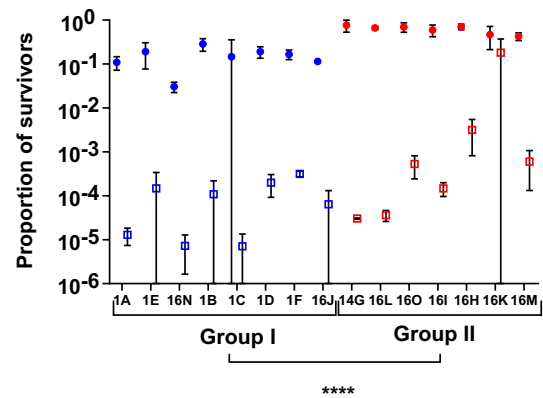

**c**

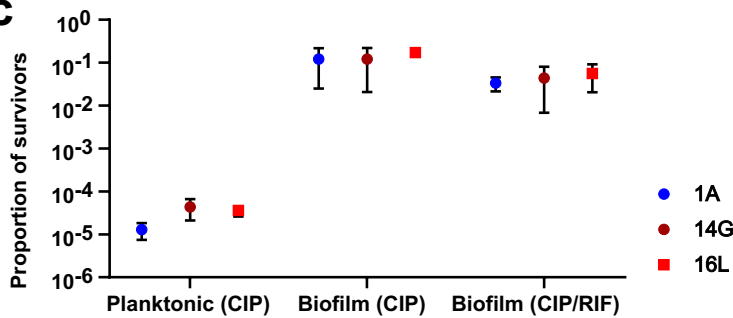

Alternative plotting with logarithmic axis of, **a** Figure 6B, **b** Figure 6C and **c** Figure 6E. Averages with standard deviation of 3 replicates are shown. Statistical significance of survival to 3h antibiotic exposure between the two groups was determined by Welch two-sample t-tests (See figure legend 6c). \*\*\*\*,  $p < 0.0001$

# Supplementary Figure 7: Antibiotic clearance of bacteria in biofilms.

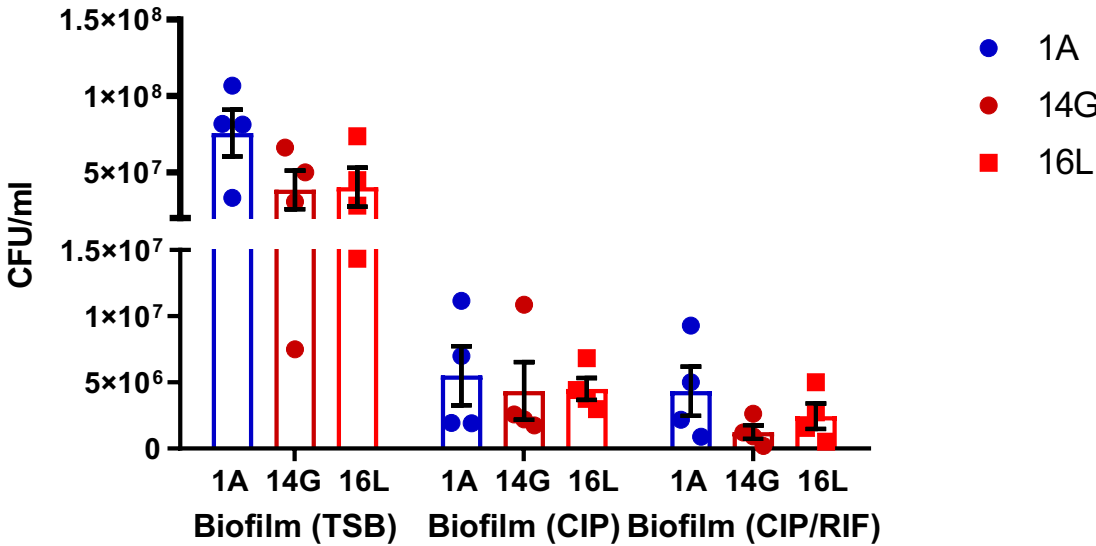

Antibiotic killing of bacteria embedded within a biofilm by ciprofloxacin and a combination of ciprofloxacin and rifampicin as compared to untreated biofilm. The amount of viable bacteria was quantified by assessing the number of CFUs grown on agar plates. Averages with standard deviation of three replicates are shown.



# Supplementary Figure 8: Time to single cells' first division

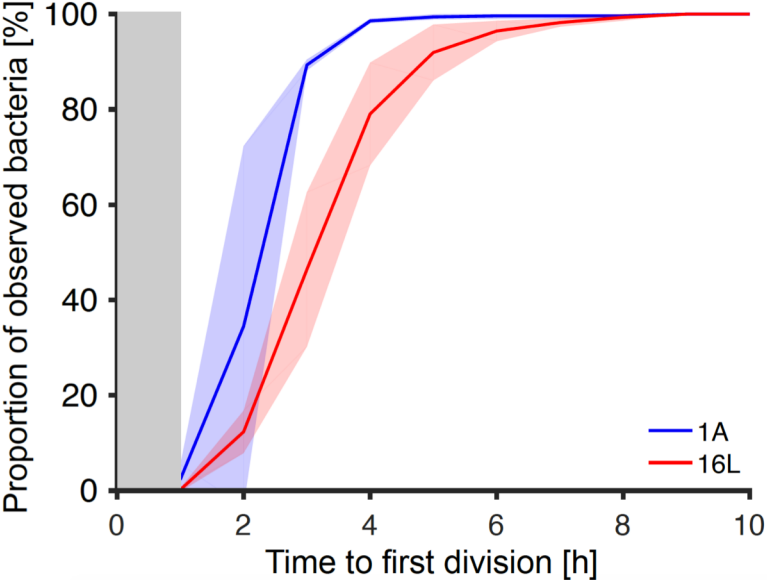

Curves show averages of three replicates and shaded areas depict standard deviation. Experiment performed in DMEM 4.5g/l glucose with 10% FBS. The time for 80% of the population to resumed growth differed by 1.5 hours between isolate 1A ( $3.3 \pm 0.3$  h) and 16L ( $4.8 \pm 0.6$  h). The grey zone marks the period at the beginning of the experiment where cell divisions could occur but not be observed.

## Supplementary Table 1: Minimum Inhibitory concentrations (MIC) of the ST378 clinical isolates

| Isolate number* | MIC [mg/L]        |                    |              |
|-----------------|-------------------|--------------------|--------------|
|                 | Cirpofloxacin     | Rifampicin         | Erythromycin |
| 1A              | 0.062 - 0.25 (S)  | < 0.0078 (S)       | 64 - 128 (R) |
| 1B              | 0.125 - 0.5 (S)   | < 0.0078 (S)       | 32 (R)       |
| 1C              | 0.062 - 0.25 (S)  | < 0.0078 (S)       | 64 - 128 (R) |
| 1D              | 0.125 - 0.25 (S)  | < 0.0078 (S)       | 64 - 128 (R) |
| 1E              | 0.062 - 0.5 (S)   | < 0.0078 (S)       | 32 - 64 (R)  |
| 1F              | 0.125 - 0.25 (S)  | < 0.0078 (S)       | 64 - 128 (R) |
| 16J             | 0.062 - 0.125 (S) | 0.015 - 0.031 (S)  | 64 (R)       |
| 16N             | 0.062 (S)         | 0.0078-0.031 (S)   | 16 - 32 (R)  |
| 14G             | 0.062 - 0.125 (S) | 0.0078 - 0.015 (S) | 16 - 32 (R)  |
| 16H             | 0.125 - 0.5 (S)   | 1 - 2 (R)          | 16 - 32 (R)  |
| 16I             | 0.062 - 0.25 (S)  | < 0.0078 (S)       | 8 - 16 (R)   |
| 16K             | 0.125 - 0.5 (S)   | 1 - 2 (R)          | 32 - 64 (R)  |
| 16L             | 0.125 - 0.25 (S)  | 0.015 (S)          | 16 - 32 (R)  |
| 16M             | 0.125 - 0.5 (S)   | 1 - 2 (R)          | 32 - 64 (R)  |
| 16O             | 0.25 (S)          | 0.125 (S)          | 8 - 32 (R)   |

Blue and red labelling of the isolate numbers indicate the ST378 sub-groups I and II, respectively. The darker red indicates the clinical isolate retrieved from the blood culture. Resistant (R), susceptible (S).

## Supplementary Table 2: Reference genomes used for tree construction

| Organism/Name                           | Strain name  | MLST <sup>1</sup>                  | MLST reference              | arCC | aroE | gtr | mutS | pyrR | tpiA | yyjL | BioSample    | BioProject  | Assembly        | Level <sup>2</sup> | Size (Mb) | GC%   | Replicons                                                                                                                                                                                                                                                                                                                   | Gene | Protein | Release Date | Modify Date |
|-----------------------------------------|--------------|------------------------------------|-----------------------------|------|------|-----|------|------|------|------|--------------|-------------|-----------------|--------------------|-----------|-------|-----------------------------------------------------------------------------------------------------------------------------------------------------------------------------------------------------------------------------------------------------------------------------------------------------------------------------|------|---------|--------------|-------------|
| Staphylococcus epidermidis ATCC 12228   | ATCC 12228   | ST8                                | Conlan <i>et al.</i> 2012   | 2    | 1    | 7   | 1    | 1    | 1    | 1    | SAMN02603126 | PRJNA279    | GCA_000007645.1 | CG                 | 2.56461   | 32.05 | chromosome:NC_004461.1/AE015929.1<br>plasmid pSE-12228-01:NC_005008.1/AE015930.1<br>plasmid pSE-12228-02:NC_005007.1/AE015931.1<br>plasmid pSE-12228-03:NC_005006.1/AE015932.1<br>plasmid pSE-12228-04:NC_005005.1/AE015933.1<br>plasmid pSE-12228-05:NC_005004.1/AE015934.1<br>plasmid pSE-12228-06:NC_005003.1/AE015935.1 | 2558 | 2482    | 20.12.02     | 03.08.16    |
| Staphylococcus epidermidis RP62A        | RP62A        | ST10                               | Conlan <i>et al.</i> 2012   | 1    | 1    | 1   | 1    | 3    | 1    | 1    | SAMN02603975 | PRJNA64     | GCA_000011925.1 | CG                 | 2.64384   | 32.2  | chromosome:NC_002976.3/CP000029.1<br>plasmid pSERP:NC_006663.1/CP000028.1                                                                                                                                                                                                                                                   | 2625 | 2462    | 09.01.02     | 22.03.17    |
| Staphylococcus epidermidis PM221        | PM221        | ST184                              | Savijoki <i>et al.</i> 2014 | 16   | 1    | 2   | 1    | 2    | 1    | 1    | SAMEA3139103 | PRJEB5186   | GCA_000751035.1 | CG                 | 2.59751   | 31.93 | chromosome I:NZ_HG813242.1/HG813242.1<br>plasmid II:NZ_HG813243.1/HG813243.1<br>plasmid III:NZ_HG813244.1/HG813244.1<br>plasmid IV:NZ_HG813245.1/HG813245.1<br>plasmid V:NZ_HG813246.1/HG813246.1                                                                                                                           | 2589 | 2399    | 14.08.14     | 24.03.17    |
| Staphylococcus epidermidis SEI          | SEI          | unknown (nearest 722, 436, 387)    | CGE                         | 1    | 13   | 7   | 6    | 2    | 5    | 33   | SAMN02928813 | PRJNA244351 | GCA_000759555.1 | CG                 | 2.53831   | 32.03 | chromosome:NZ_CP009046.1/CP009046.1<br>plasmid unnamed:NZ_CP009047.1/CP009047.1                                                                                                                                                                                                                                             | 2504 | 2311    | 29.09.14     | 24.03.17    |
| Staphylococcus epidermidis 14.1.R1      | 14.1.R1      | unknown (nearest 573)              | CGE                         | 49   | 29   | 9   | 30   | 7    | 5    | 56   | SAMN06167133 | PRJNA358169 | GCA_001956655.2 | CG                 | 2.62533   | 32.18 | chromosome:NZ_CP018842.1/CP018842.1<br>CP018841.1/CP018841.1<br>plasmid pHOB1:NZ_CP018843.1/CP018843.1<br>plasmid pHOB2:NZ_CP018844.1/CP018844.1                                                                                                                                                                            | 2628 | 2378    | 05.01.17     | 05.02.18    |
| Staphylococcus epidermidis 1457         | 1457         | ST86                               | CGE                         | 1    | 2    | 2   | 1    | 1    | 1    | 1    | SAMN02640609 | PRJNA377759 | GCA_002085695.1 | CG                 | 2.47007   | 32.27 | chromosome:NZ_CP020463.1/CP020463.1                                                                                                                                                                                                                                                                                         | 2433 | 2283    | 11.04.17     | 30.01.18    |
| Staphylococcus epidermidis DAR1907      | DAR1907      | ST2                                | CGE                         | 7    | 1    | 2   | 2    | 4    | 1    | 1    | SAMN07444319 | PRJNA308322 | GCA_002850315.1 | CG                 | 2.72755   | 32.1  | chromosome:NZ_CP013943.1/CP013943.1                                                                                                                                                                                                                                                                                         | 2748 | 2584    | 03.01.18     | 11.01.18    |
| Staphylococcus epidermidis FDAARGOS_153 | FDAARGOS_153 | ST5                                | CGE                         | 1    | 1    | 1   | 2    | 2    | 1    | 1    | SAMN03996299 | PRJNA231221 | GCA_002944995.1 | CG                 | 2.55197   | 32.1  | chromosome:NZ_CP014119.1/CP014119.1<br>plasmid unnamed1:NZ_CP014118.1/CP014118.1<br>plasmid unnamed2:NZ_CP014120.1/CP014120.1<br>plasmid unnamed3:NZ_CP014117.1/CP014117.1<br>plasmid unnamed4:NZ_CP014116.1/CP014116.1                                                                                                     | 2498 | 2331    | 08.02.18     | 02.03.18    |
| Staphylococcus epidermidis FDAARGOS_161 | FDAARGOS_161 | ST20                               | CGE                         | 1    | 1    | 2   | 2    | 1    | 1    | 3    | SAMN03996306 | PRJNA231221 | GCA_002954055.1 | CG                 | 2.51573   | 32.18 | chromosome:NZ_CP014132.1/CP014132.1<br>plasmid unnamed1:NZ_CP014130.1/CP014130.1<br>plasmid unnamed2:NZ_CP014131.1/CP014131.1                                                                                                                                                                                               | 2466 | 2304    | 20.02.18     | 04.03.18    |
| Staphylococcus epidermidis BPH0662      | BPH0662      | ST2                                | Lee <i>et al.</i> 2016      | 7    | 1    | 2   | 2    | 4    | 1    | 1    | SAMEA3982825 | PRJEB13975  | GCA_900086615.1 | CG                 | 2.84117   | 31.97 | chromosome 1:NZ_LT571449.1/LT571449.1<br>plasmid 2:NZ_LT571450.1/LT571450.1<br>plasmid 3:NZ_LT571451.1/LT571451.1                                                                                                                                                                                                           | 2855 | 2699    | 12.05.16     | 28.03.17    |
| Staphylococcus epidermidis SE90         | SE90         | unknown (nearest 442)              | CGE                         | 28   | 22   | 13  | 4    | 3    | 4    | 56   | SAMN07702384 | PRJNA412200 | GCA_002749455.1 | Ch                 | 2.4186    | 32.04 | chromosome:NZ_CP024408.1/CP024408.1<br>plasmid p1_90:NZ_CP024409.1/CP024409.1<br>plasmid p2_90:NZ_CP024410.1/CP024410.1                                                                                                                                                                                                     | 2383 | 2225    | 03.11.17     | 06.11.17    |
| Staphylococcus epidermidis SE95         | SE95         | unknown (nearest 743)              | CGE                         | 65   | 3    | 5   | 5    | 3    | 22   | 45   | SAMN07702411 | PRJNA412208 | GCA_002749515.1 | Ch                 | 2.43784   | 32.07 | chromosome:NZ_CP024437.1/CP024437.1<br>plasmid p_1_95:NZ_CP024438.1/CP024438.1<br>plasmid p_2_95:NZ_CP024439.1/CP024439.1<br>plasmid p_3_95:NZ_CP024440.1/CP024440.1<br>plasmid p_4_95:NZ_CP024441.1/CP024441.1                                                                                                             | 2399 | 2216    | 03.11.17     | 06.11.17    |
| Staphylococcus epidermidis GTH12        | GTH12        | unknown (nearest 454, 115, 89, 88) | CGE                         | 1    | 1    | 2   | 1    | 2    | 1    | 45   | SAMN08555375 | PRJNA434386 | GCA_003119275.1 | Ch                 | 2.49953   | 33.2  | chromosome:CP028282.1                                                                                                                                                                                                                                                                                                       | -    | -       | 11.05.18     | 11.05.18    |
| Staphylococcus epidermidis 949_S8       | 949_S8       | unknown (nearest 536)              | CGE                         | 1    | 5    | 1   | 2    | 2    | 1    | 4    | SAMN03339004 | PRJNA274731 | GCA_000934225.1 | Ch                 | 2.33987   | 32    | chromosome:CP010942.1                                                                                                                                                                                                                                                                                                       | 2221 | 2119    | 24.02.15     | 05.08.15    |

<sup>1</sup>Multilocus sequence typing (MLST) with tool from Center for Genomic Epidemiology (CGE) or from indicated references.

<sup>2</sup>Complete Genome (CG), chromosome (Ch)

## Supplementary Table 3: Summary of the variants found in the ST378 clinical isolates

|    | Position in RP62A | Type | Reference                     | Allele | Length | Gene name/function                                                                          | AA change                      | Isolates                         | Cluster |
|----|-------------------|------|-------------------------------|--------|--------|---------------------------------------------------------------------------------------------|--------------------------------|----------------------------------|---------|
| 1  | 90580             | SNP  | C                             | T      | 1      | Multimodular transpeptidase-transglycosylase/ Penicillin-binding protein 1A/1B (PBP1)       | synonymous                     | 1A, 1B, 1C, 1D, 1E, 1F, 16J, 16N | Group I |
| 2  | 315658            | SNP  | G                             | A      | 1      | GraR, two-component response regulator                                                      | Gly59Arg                       | 1A, 1B, 1C, 1D, 1E, 1F, 16J, 16N |         |
| 3  | 348486            | SNP  | C                             | A      | 1      | Sodium/di- and tricarboxylate cotransporter                                                 | Ser161stop                     | 1A, 1B, 1C, 1D, 1E, 1F, 16J, 16N |         |
| 4  | 990611..990612    | Del  | CG                            | -      | 2      | Cold-shock protein CspA                                                                     | Gly57fs                        | 1A, 1B, 1C, 1D, 1E, 1F, 16J, 16N |         |
| 5  | 1735899           | SNP  | G                             | T      | 1      | RodA, rod shape-determining protein / FtsW, cell division protein                           | Gly161Val                      | 1A, 1B, 1C, 1D, 1E, 1F, 16J, 16N |         |
| 6  | 1864486           | SNP  | G                             | A      | 1      | PbuG, Hypoxanthine/guanine permease                                                         | Ser27Leu                       | 1A, 1B, 1C, 1D, 1E, 1F, 16J, 16N |         |
| 7  | 188678            | SNP  | G                             | T      | 1      | RpoB, DNA-directed RNA polymerase beta subunit                                              | Arg917Leu                      | 1A, 1B, 1C, 1D, 1E, 1F, 16N      |         |
| 8  | 85098             | SNP  | T                             | C      | 1      | Sle1, Autolysin, N-acetylmuramoyl-L-alanine amidase                                         | Val67Ala                       | 1A                               |         |
| 9  | 398168            | SNP  | C                             | T      | 1      | NrdI, Ribonucleotide reduction protein                                                      | Arg14stop                      | 1A                               |         |
| 10 | 1239544           | SNP  | C                             | T      | 1      | SecDF, protein translocase subunit                                                          | Ser621Asn                      | 1A                               |         |
| 11 | 2372735           | SNP  | G                             | C      | 1      | Bicyclomycin resistance protein TcaB/ Major myo-inositol transporter IolT                   | Pro64Ala                       | 1A                               |         |
| 12 | 169028..169048    | Del  | TTGTGCAT<br>GTGCCAA<br>CACACG | -      | 21     | ClpC, ATP-dependent Clp protease ATP-binding subunit                                        | Arg12_Gln18del                 | 1B, 1E, 16N                      | ★       |
| 13 | 398462..398468    | Del  | GAATTTA                       | -      | 7      | NrdI, Ribonucleotide reduction protein                                                      | Glu112fs                       | 1B, 1E, 16N                      |         |
| 14 | 1296398           | SNP  | C                             | G      | 1      | isocitrate dehydrogenase                                                                    | Val356Leu                      | 1B, 1E, 16N                      |         |
| 15 | 10897             | SNP  | A                             | G      | 1      | Putative metal chaperone, involved in Zn homeostasis, GTPase of COG0523 family              | synonymous                     | 1E                               |         |
| 16 | 92614             | SNP  | T                             | C      | 1      | membrane protein, putative                                                                  | synonymous                     | 1E                               |         |
| 17 | 435659..435660    | SNP  | G                             | C      | 1      | SufB, Fe-S cluster assembly protein                                                         | Ala129Gly                      | 1E                               |         |
| 18 | 1211190           | SNP  | C                             | G      | 1      | peptidase, U32 family large subunit [C1]                                                    | Glu90Gln                       | 1E                               |         |
| 19 | 1182887           | SNP  | T                             | C      | 1      | PrmA, ribosomal protein L11 methyltransferase                                               | Asp107Gly                      | 1B, 16N                          | ■       |
| 20 | 1923243           | SNP  | G                             | A      | 1      | Sialic acid utilization regulator, RpiR family / MurR/RpiR family transcriptional regulator | Val84Ile                       | 1B, 16N                          |         |
| 21 | 2589790           | SNP  | A                             | G      | 1      | Two-component sensor kinase WalK                                                            | Met428Thr                      | 1B, 16N                          |         |
| 22 | 9376              | SNP  | A                             | G      | 1      | hypothetical protein                                                                        | synonymous                     | 16N                              |         |
| 23 | 279591            | SNP  | C                             | T      | 1      | SarA, Staphylococcal accessory regulator A                                                  | Ala70Thr                       | 16N                              |         |
| 24 | 1312426..1312429  | Del  | TTTG                          | -      | 4      | 3'-to-5' oligoribonuclease A                                                                | Pro46fs                        | 16N                              |         |
| 25 | 1319725           | SNP  | T                             | C      | 1      | acetate kinase                                                                              | Thr239Ala                      | 16N                              |         |
| 26 | 1970731..1970742  | Del  | GAAGCAC<br>CAGGT              | -      | 12     | Mqo, malate:quinone oxidoreductase                                                          | Ser431_Pro432_Glv433_Ala434del | 16N                              |         |
| 27 | 1912086           | SNP  | G                             | C      | 1      | Salicylate hydroxylase                                                                      | Ala290Gly                      | 1C, 1D, 1F                       | ●       |
| 28 | 294063..294064    | Del  | TA                            | -      | 2      | Manganese ABC transporter, inner membrane permease protein SitD                             | Tyr243fs                       | 1C                               |         |
| 29 | 398288            | SNP  | C                             | T      | 1      | NrdI, Ribonucleotide reduction protein                                                      | Gln54stop                      | 1C                               |         |
| 30 | 1219569           | SNP  | A                             | G      | 1      | YrrC, RecD-like DNA helicase, deoxyribonuclease                                             | Ile122Thr                      | 1C                               |         |
| 31 | 40832             | SNP  | A                             | T      | 1      | RpoC, DNA-directed RNA polymerase beta' subunit                                             | synonymous                     | 1D, 1F                           | ▲       |
| 32 | 190909            | SNP  | G                             | T      | 1      | RpoC, DNA-directed RNA polymerase beta' subunit                                             | Gly433Val                      | 1D, 1F                           |         |
| 33 | 1099372           | SNP  | T                             | C      | 1      | RibU, Riboflavin transporter                                                                | Met1Val                        | 1D, 1F                           |         |

Blue shading indicates isolate group I and red shading isolate group II. The purple highlighted genes are likely to be under a general selection pressure within the host, as they are mutated in different positions and across many branches of the phylogenetic tree. The symbols in last column are a guide to visualize the mutations characteristic to a specific cluster, they are shown on the corresponding tree branches in Figure 2B. Deletion (Del), Insertion (Ins), single nucleotide polymorphism (SNP).

## Supplementary Table 3 (Continuation)

|    | Position in RP62A | Type | Reference | Allele | Length | Gene name/function                                                                    | AA change                  | Isolates                                        | Cluster  |
|----|-------------------|------|-----------|--------|--------|---------------------------------------------------------------------------------------|----------------------------|-------------------------------------------------|----------|
| 34 | 489412            | SNP  | A         | G      | 1      | Iron-sulfur cluster assembly scaffold protein NifU                                    | Lys134Glu                  | 1D                                              |          |
| 35 | 124653            | SNP  | T         | C      | 1      |                                                                                       | Phe33Ser                   | 1F                                              |          |
| 36 | 1101687           | SNP  | A         | C      | 1      | SrrB, respiratory response protein                                                    | Ile13Ser                   | 1F                                              |          |
| 37 | 186338            | SNP  | A         | C      | 1      | RpoB, DNA-directed RNA polymerase beta subunit                                        | Gln137Pro                  | 16J                                             |          |
| 38 | 331340^331341     | Ins  | -         | AG     | 2      | Predicted RNA-binding protein, associated with RNase of E/G family                    | Val15fs                    | 16J                                             |          |
| 39 | 524546            | Del  | T         | -      | 1      | general stress protein 13 (contains ribosomal protein S1 (RPS1) domain)               | Thr31fs                    | 16J                                             |          |
| 40 | 1970921           | SNP  | G         | A      | 1      | Mqo, malate:quinone oxidoreductase                                                    | Arg375Trp                  | 16J                                             |          |
| 41 | 1503567           | SNP  | T         | A      | 1      | PutP, Proline/sodium symporter                                                        | Leu353stop                 | 1A, 1B, 1C, 1D, 1E, 1F, 16J, 16N, 14G, 16L, 16O |          |
| 42 | 243329            | SNP  | G         | T      | 1      | Pta, Phosphate acetyltransferase                                                      | Asp245Tyr                  | 14G, 16H, 16I, 16K, 16L, 16M, 16O               | Group II |
| 43 | 743713            | SNP  | G         | T      | 1      | penicillin-binding protein 1/Cell division protein FtsI                               | Val605Leu                  | 14G, 16H, 16I, 16K, 16L, 16M, 16O               |          |
| 44 | 1724485           | SNP  | G         | T      | 1      | RsbU, sigma factor B regulator                                                        | Thr325Asn                  | 14G, 16H, 16I, 16K, 16L, 16M, 16O               |          |
| 45 | 1788877           | SNP  | C         | A      | 1      | RNA-binding protein, Conserved Protein Domain Family EVE RNA binding                  | Trp17Cys                   | 14G, 16H, 16I, 16K, 16L, 16M, 16O               |          |
| 46 | 1007576..1007577  | Del  | AA        | -      | 2      | ArlR, two-component response regulator                                                | Leu51fs                    | 14G, 16H, 16I, 16K, 16L, 16M, 16O               |          |
| 47 | 1971641           | SNP  | G         | A      | 1      | Mqo, malate:quinone oxidoreductase                                                    | Arg132stop                 | 14G, 16H, 16I, 16K, 16L, 16M, 16O               |          |
| 48 | 187392^187393     | Ins  | -         | GGGCCT | 6      | RpoB, DNA-directed RNA polymerase beta subunit                                        | Gly491_Gly492<br>insProGly | 14G, 16L, 16O                                   | ★        |
| 49 | 1327856           | SNP  | G         | A      | 1      | MsrC, Free methionine-(R)-sulfoxide reductase                                         | Gly64Asp                   | 14G, 16L, 16O                                   |          |
| 50 | 2219210           | SNP  | G         | T      | 1      | Sat, sulfate adenylyltransferase                                                      | Pro348Gln                  | 14G, 16L, 16O                                   |          |
| 51 | 2362000           | SNP  | C         | T      | 1      | pyruvate dehydrogenase subunit beta / branched-chain alpha-keto acid dehydrogenase E1 | Glu201Lys                  | 14G, 16L, 16O                                   |          |
| 52 | 948144^948145     | Ins  | -         | TTGAAC | 6      | MprF virulence factor, phosphatidylglycerol lysyltransferase                          | Glu791_His792<br>insLeuGlu | 16L                                             |          |
| 53 | 84065             | SNP  | A         | T      | 1      | GdpP, Phosphoesterase, DHH family protein                                             | synonymous                 | 16L, 16H, 16I, 16K                              |          |
| 54 | 827107^827108     | Ins  | -         | A      | 1      | GTP-sensing transcriptional pleiotropic repressor CodY                                | Glu254fs                   | 16H, 16I, 16K, 16M                              | ■        |
| 55 | 879115            | SNP  | G         | C      | 1      | glycerol-3-phosphate responsive antiterminator                                        | Gly129Ala                  | 16H, 16I, 16K, 16M                              |          |
| 56 | 1182494           | SNP  | T         | G      | 1      | PrmA, ribosomal protein L11 methyltransferase                                         | Glu238Ala                  | 16H, 16I, 16K, 16M                              |          |
| 57 | 187403            | SNP  | G         | T      | 1      | RpoB, DNA-directed RNA polymerase beta subunit                                        | Gly492Val                  | 16I                                             |          |
| 58 | 579464            | Del  | C         | -      | 1      | RelQ, (p)ppGpp synthetase                                                             | Phe40fs                    | 16I                                             |          |
| 59 | 1233442           | SNP  | C         | A      | 1      | RSH, (p)ppGpp synthase/hydrolase                                                      | Leu533Phe                  | 16H, 16K, 16M                                   | ●        |
| 60 | 187344^187345     | Ins  | -         | GCT    | 3      | RpoB, DNA-directed RNA polymerase beta subunit                                        | Ala473_Asn474<br>insAla    | 16H, 16K, 16M                                   |          |
| 61 | 1968672           | SNP  | A         | G      | 1      | HssR, heme response regulator                                                         | Thr95Ala                   | 16H, 16K, 16M                                   |          |
| 62 | 1560546           | Del  | A         | -      | 1      | AgrA, accessory gene regulator protein A                                              | Glu42fs                    | 16H                                             |          |
| 63 | 2463079           | SNP  | C         | A      | 1      | Hypothetical serine protease                                                          | Arg78Ile                   | 16H                                             |          |
| 64 | 1561074           | SNP  | G         | C      | 1      | AgrA, accessory gene regulator protein A                                              | Arg218Pro                  | 16M                                             |          |
| 65 | 2023218..2023223  | Del  | ATATGT    | -      | 6      | L-Cystine ABC transporter, periplasmic cystine-binding protein TcyA                   | Thr45_Tyr46del             | 16M                                             |          |

# References

- 1) Conlan, S. et al. (2012) ***Staphylococcus epidermidis* pan-genome sequence analysis reveals diversity of skin commensal and hospital infection-associated isolates**, Genome Biology. BioMed Central Ltd, 13(7), p. R64. doi: 10.1186/gb-2012-13-7-r64.
- 2) Lee, J. Y. H. et al. (2016) **Functional analysis of the first complete genome sequence of a multidrug resistant sequence type 2 *Staphylococcus epidermidis***, Microbial Genomics, 2(9), pp. 1–15. doi: 10.1099/mgen.0.000077.
- 3) Savijoki, K. et al. (2014) **Genomics and proteomics provide new insight into the commensal and pathogenic lifestyles of bovine- and human-associated *Staphylococcus epidermidis* strains**, Journal of Proteome Research, 13(8), pp. 3748–3762. doi: 10.1021/pr500322d.
